# Supplementary material
Source: PubMed Central journal article supplement (PMC4279426)

# Supplemental Figure S1

A

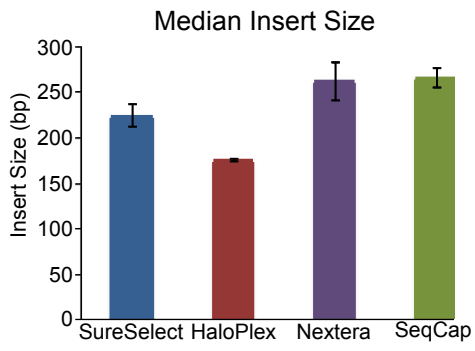

B

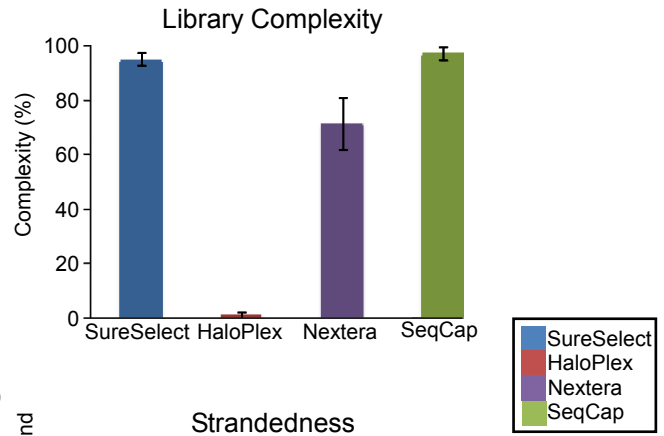

C

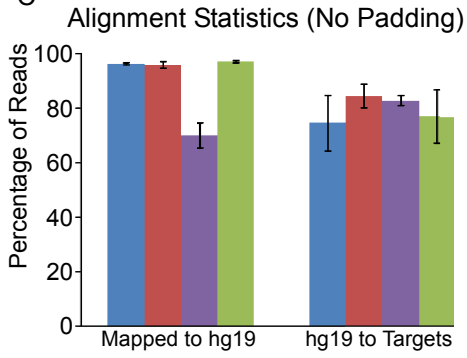

D

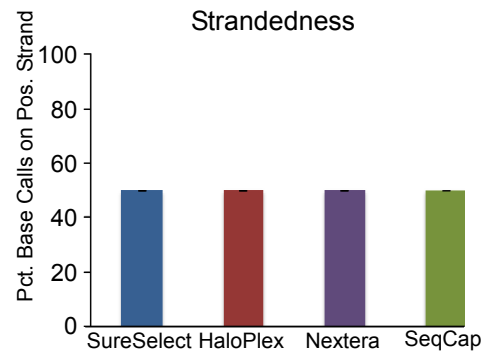

Supplement: mmc1.pdf [file mmc1.pdf]

# Supplemental Figure S10

A

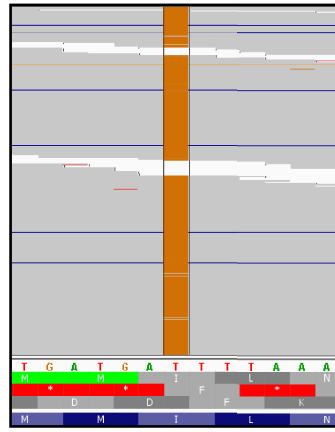

SureSelect

B

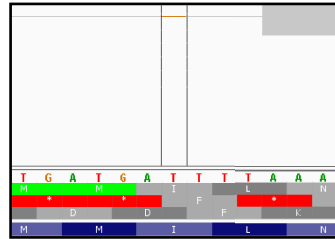

HaloPlex

C

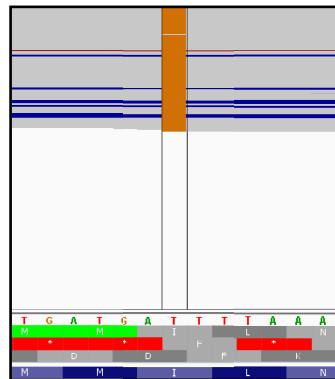

Nextera

D

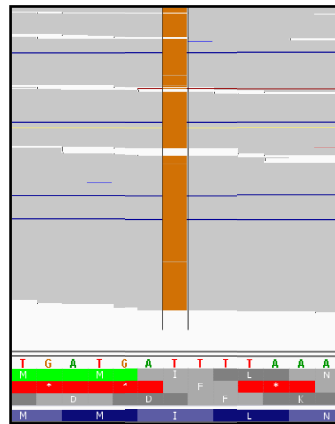

SeqCap

Supplement: mmc10.pdf [file mmc10.pdf]

# Supplemental Figure S11

A

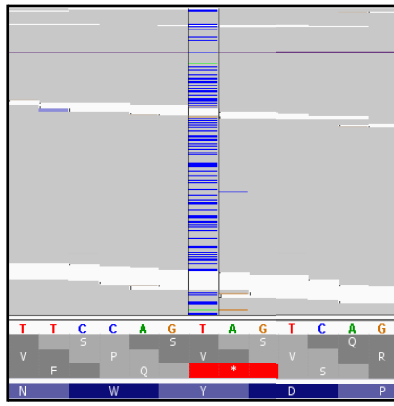

SureSelect

B

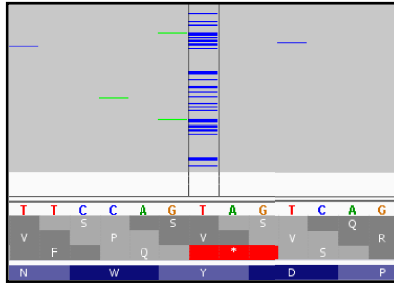

HaloPlex

C

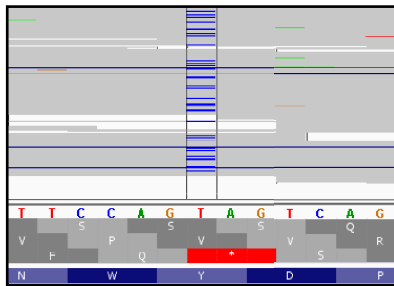

Nextera

D

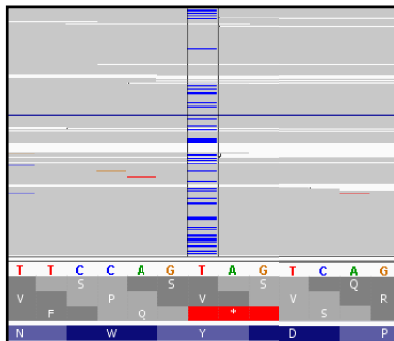

SeqCap

Supplement: mmc11.pdf [file mmc11.pdf]

# Supplemental Figure S12

A

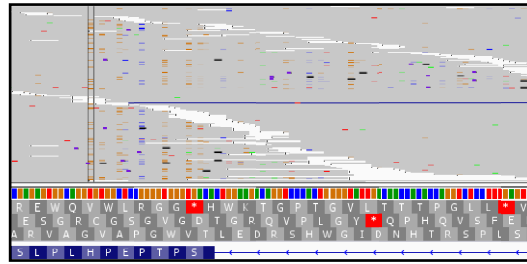

SureSelect

B

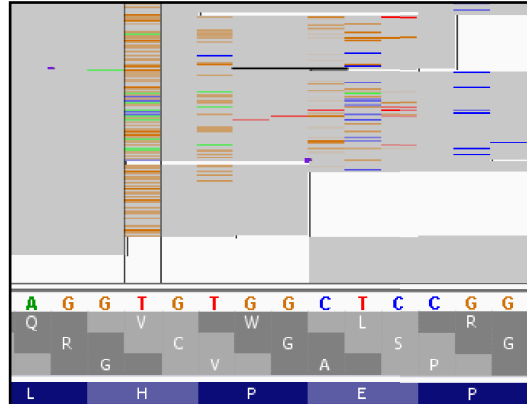

HaloPlex

C

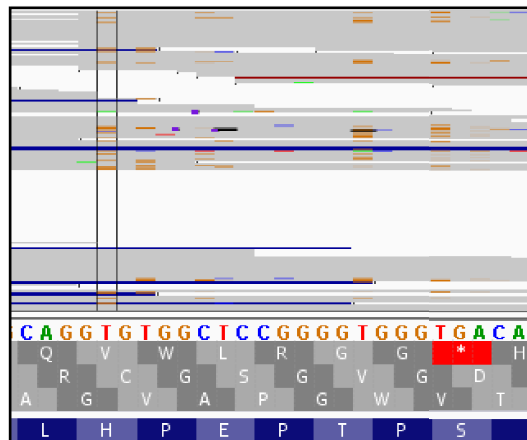

Nextera

D

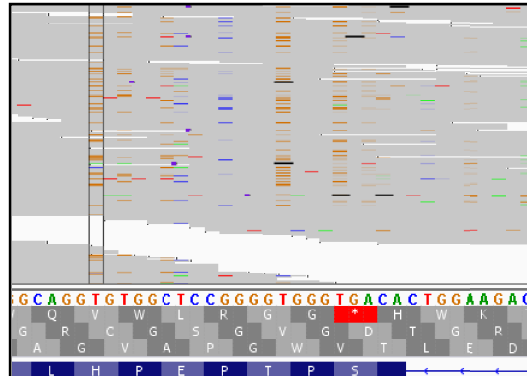

SeqCap

Supplement: mmc12.pdf [file mmc12.pdf]

# Supplemental Figure S13

A

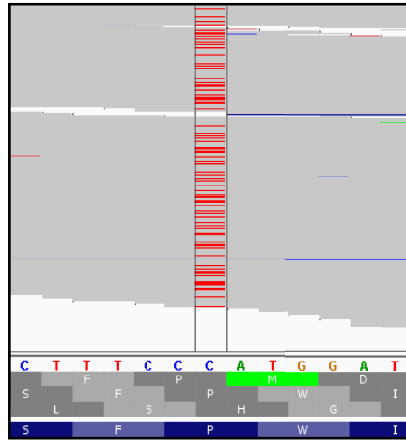

SureSelect

B

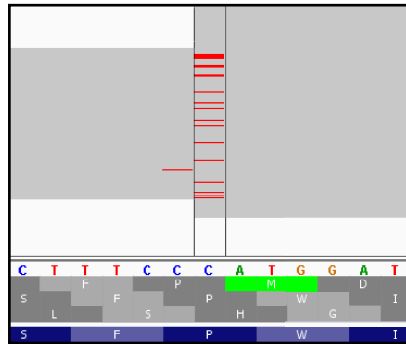

HaloPlex

C

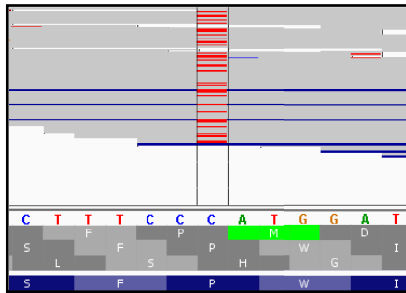

Nextera

D

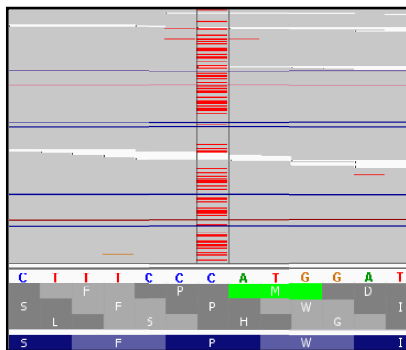

SeqCap

Supplement: mmc13.pdf [file mmc13.pdf]

# Supplemental Figure S14

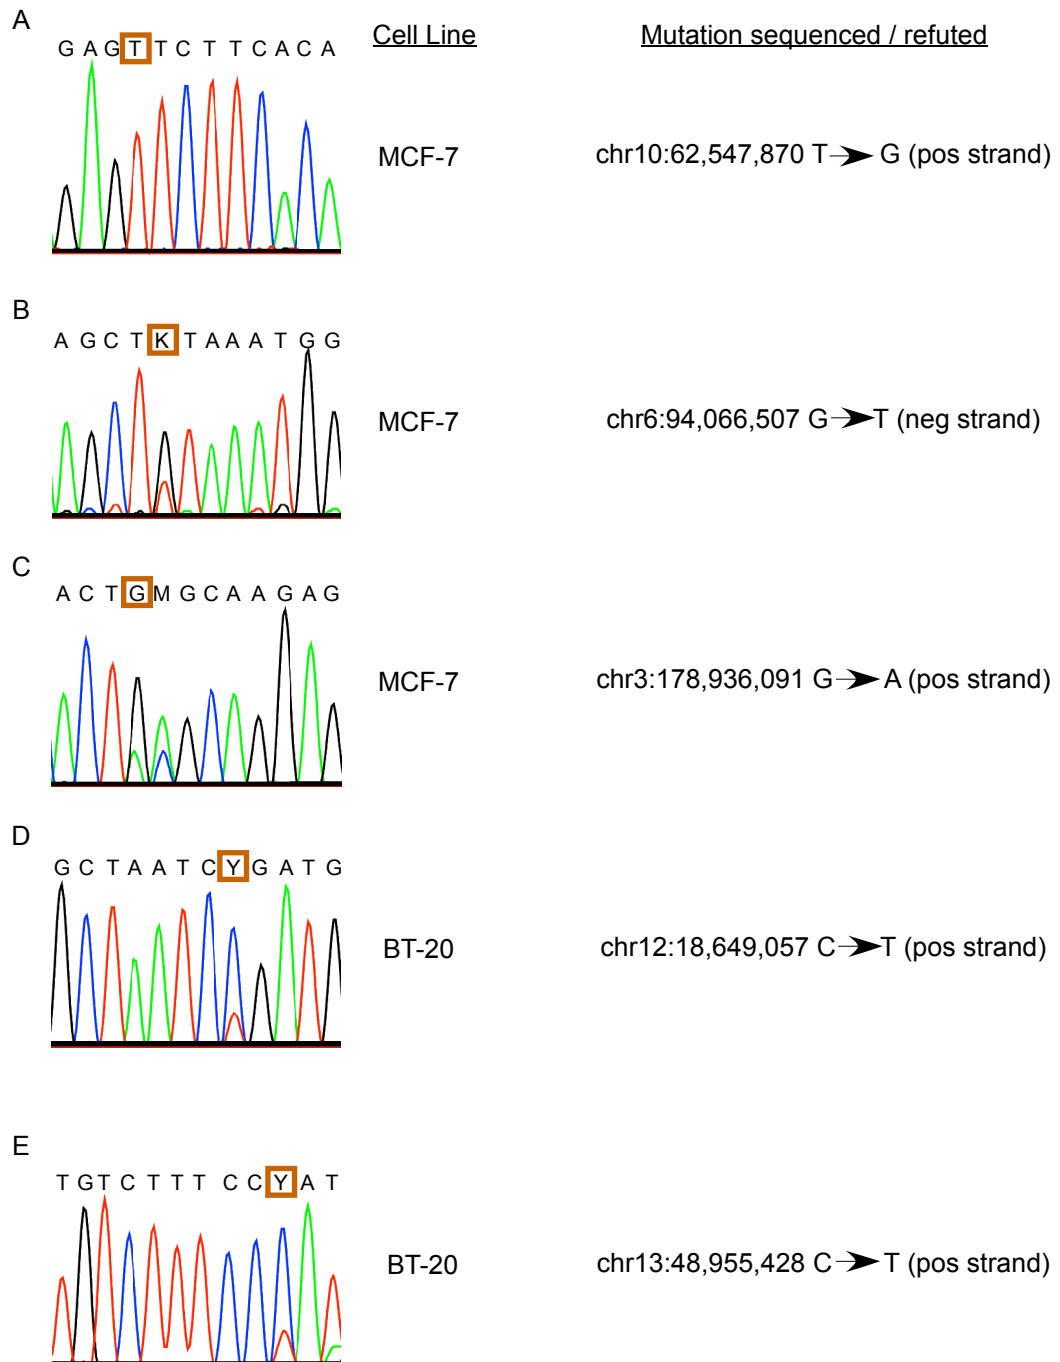

Supplement: mmc14.pdf [file mmc14.pdf]

# Supplemental Figure S2

A

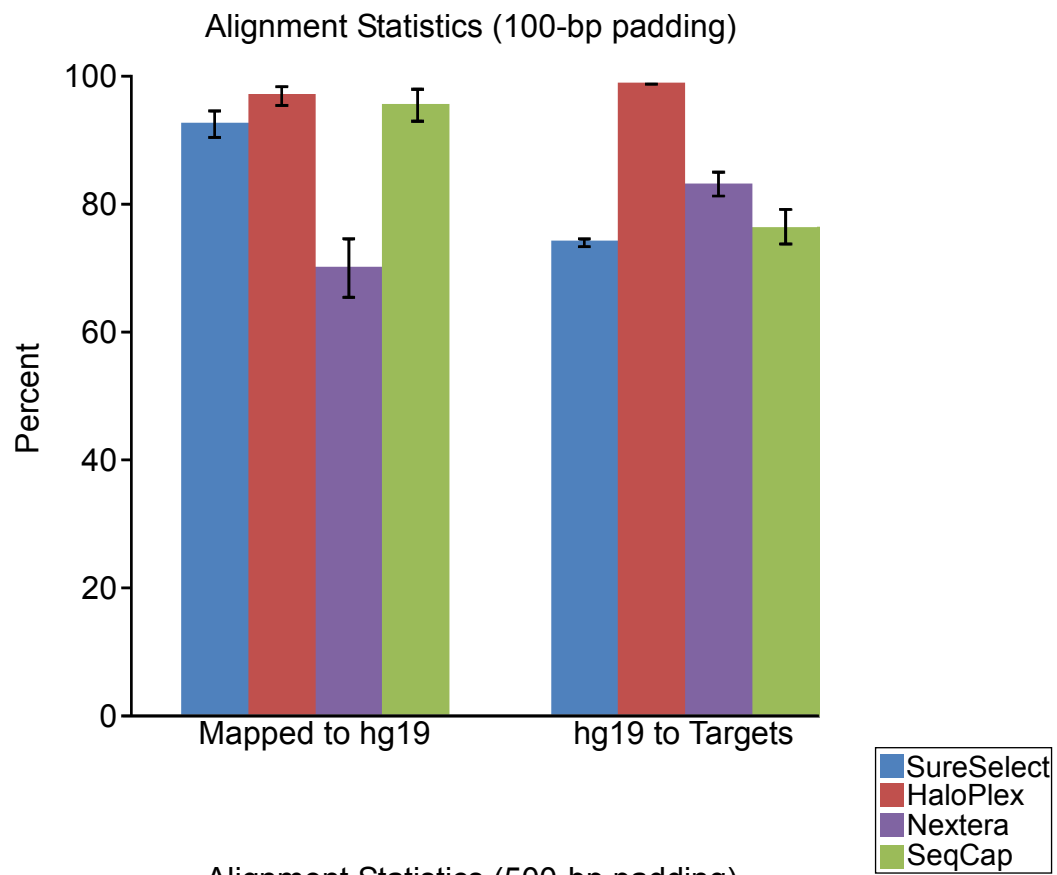

B

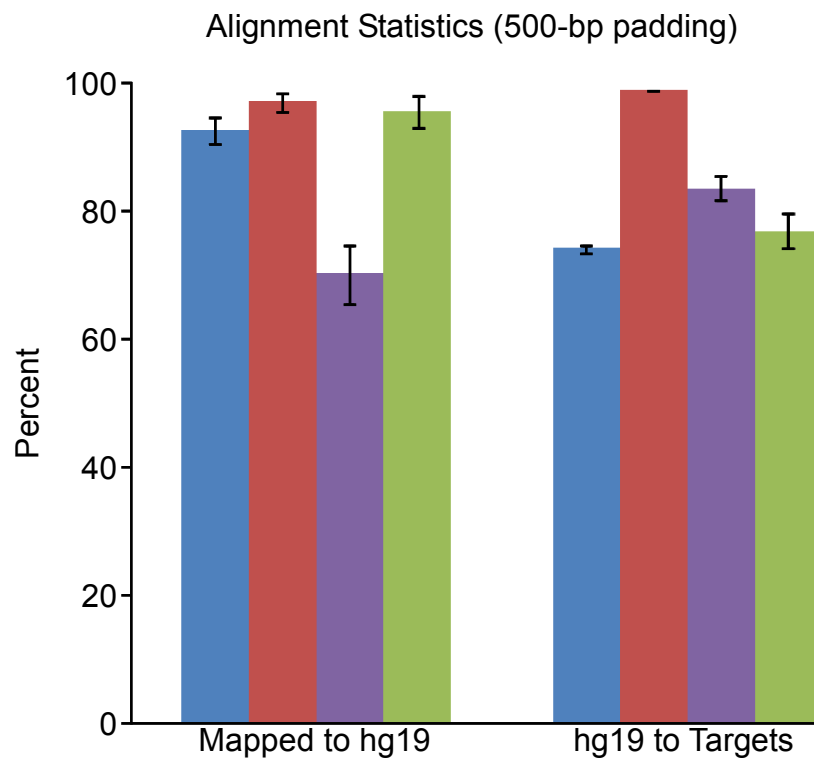

Supplement: mmc2.pdf [file mmc2.pdf]

# Supplemental Figure S3

A

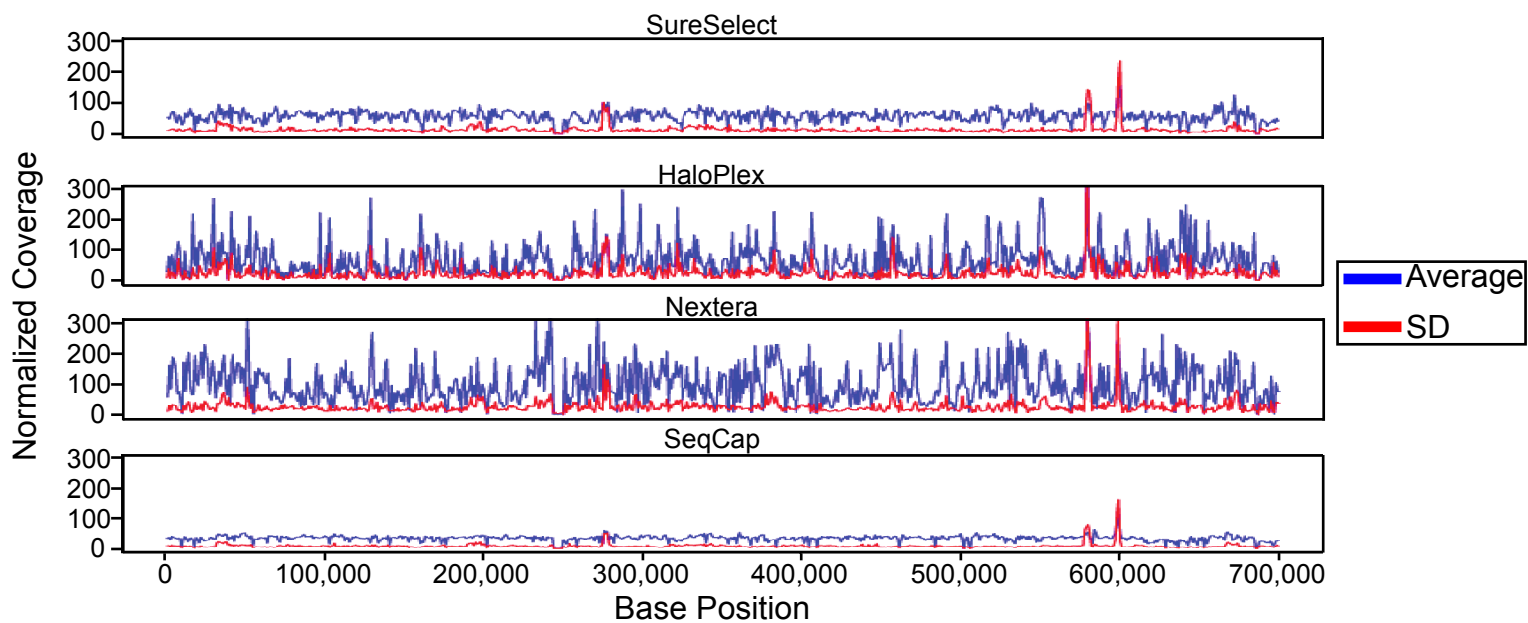

B

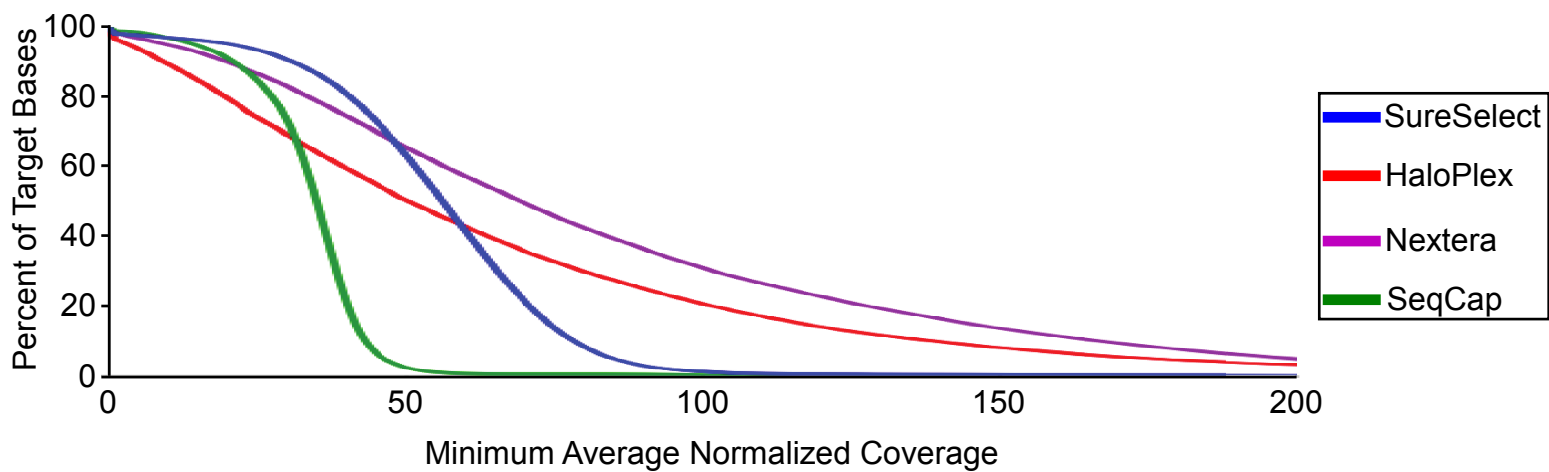

Supplement: mmc3.pdf [file mmc3.pdf]

# Supplemental Figure S4

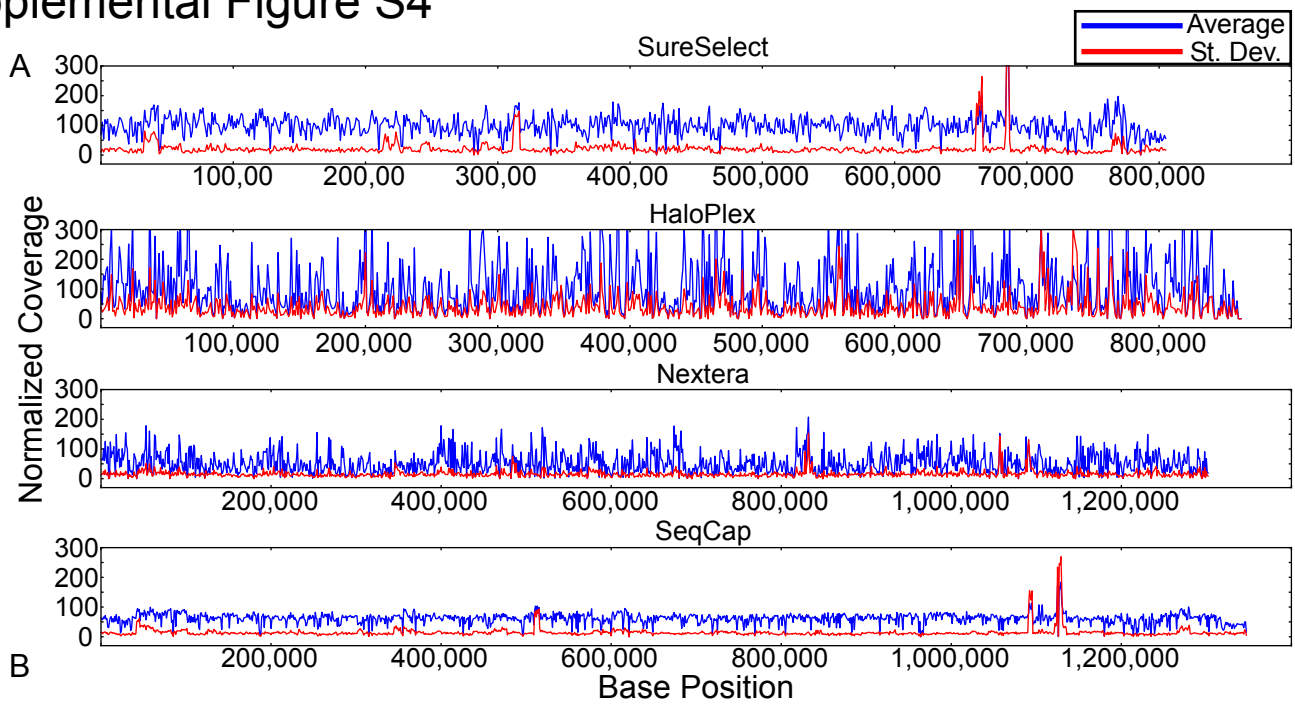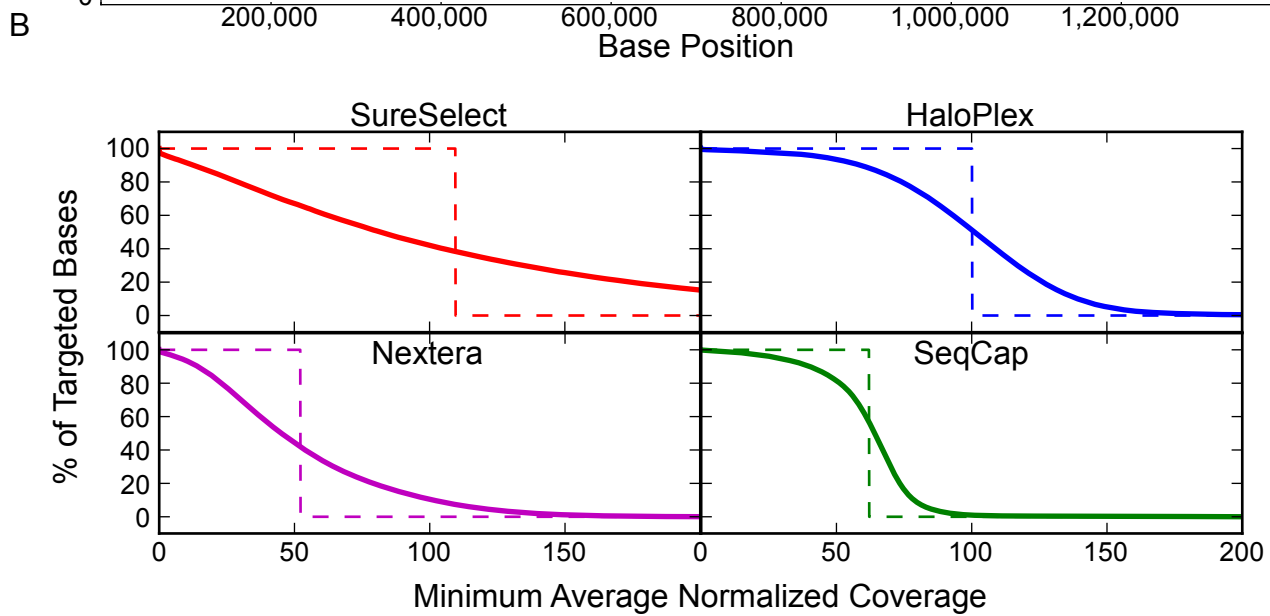

Supplement: mmc4.pdf [file mmc4.pdf]

# Supplemental Figure S5

## How GC Content Affects Technology Performance

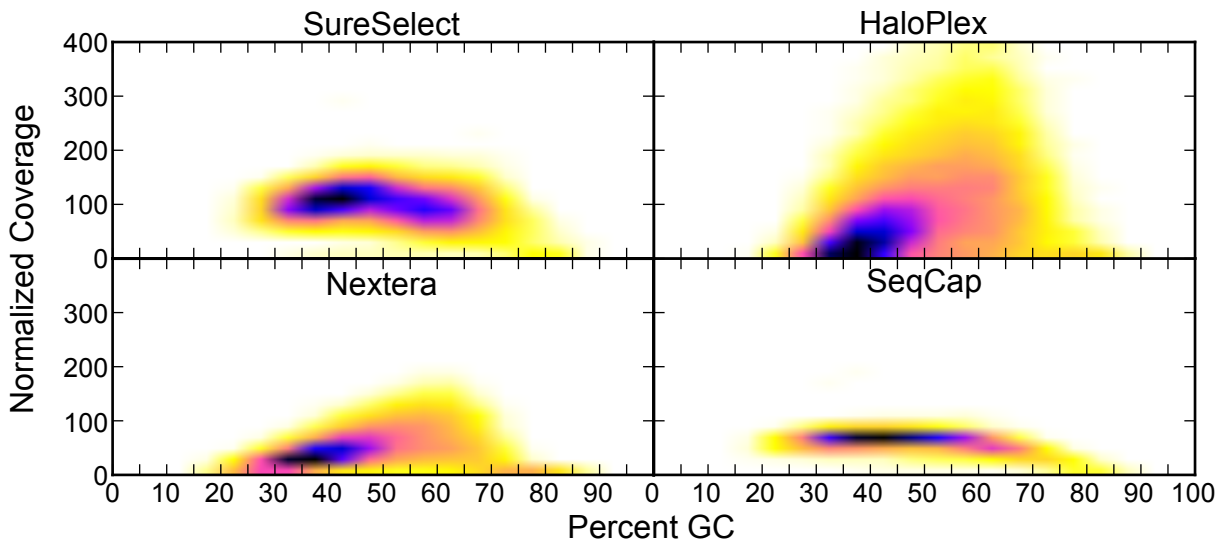

Supplement: mmc5.pdf [file mmc5.pdf]

# Supplemental Figure S6

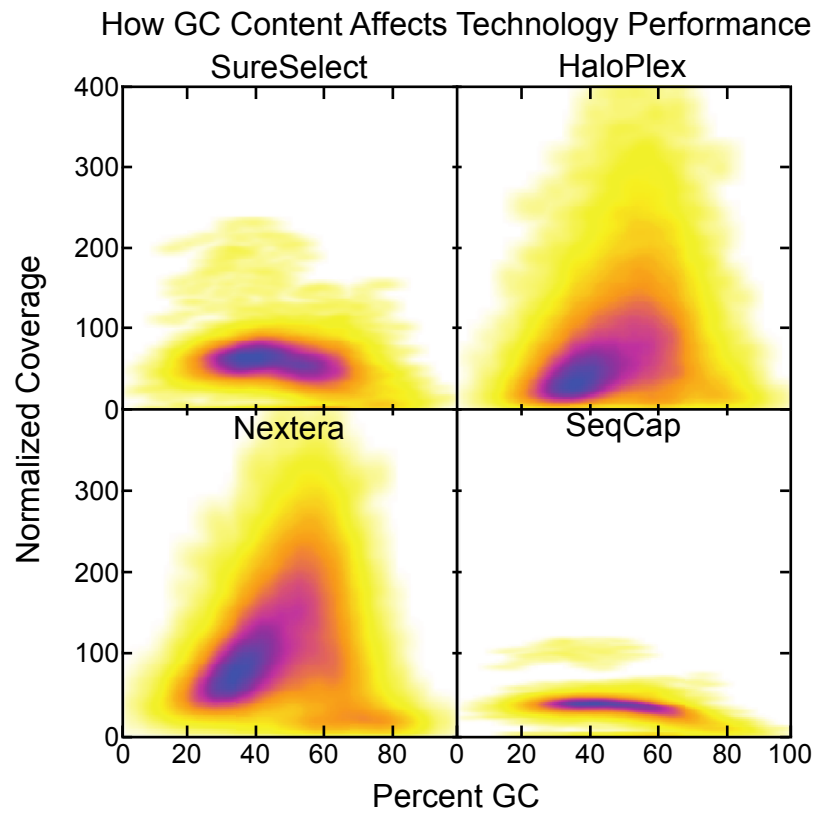

Supplement: mmc6.pdf [file mmc6.pdf]

# Supplemental Figure S7

## All single-sample SNVs

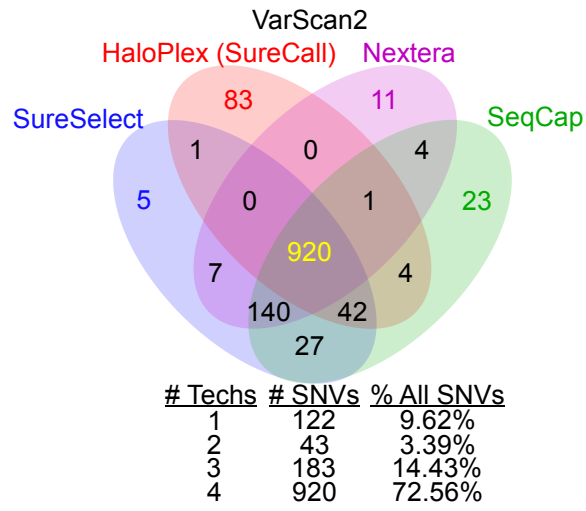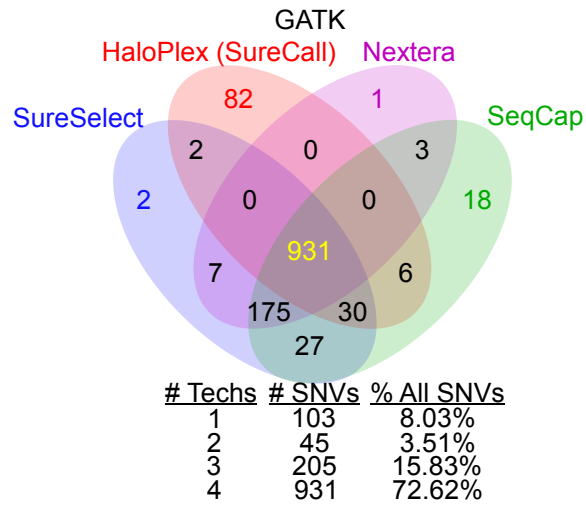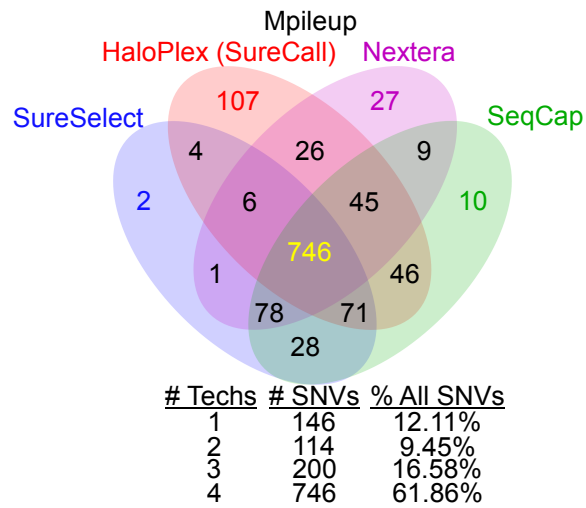

Supplement: mmc7.pdf [file mmc7.pdf]

# Supplemental Figure S8

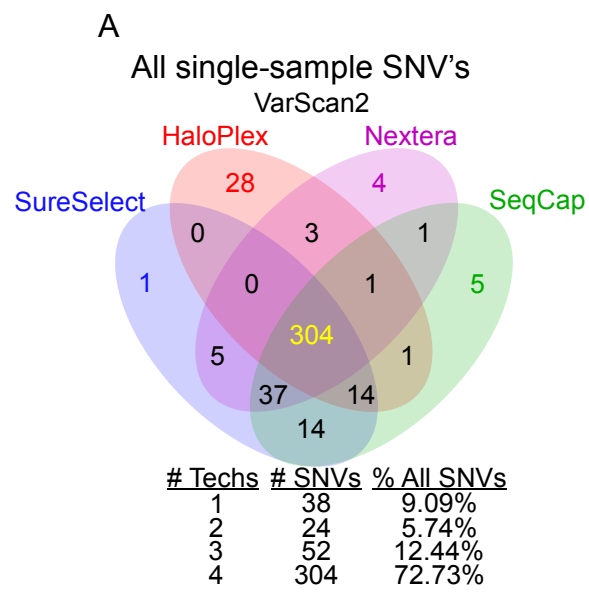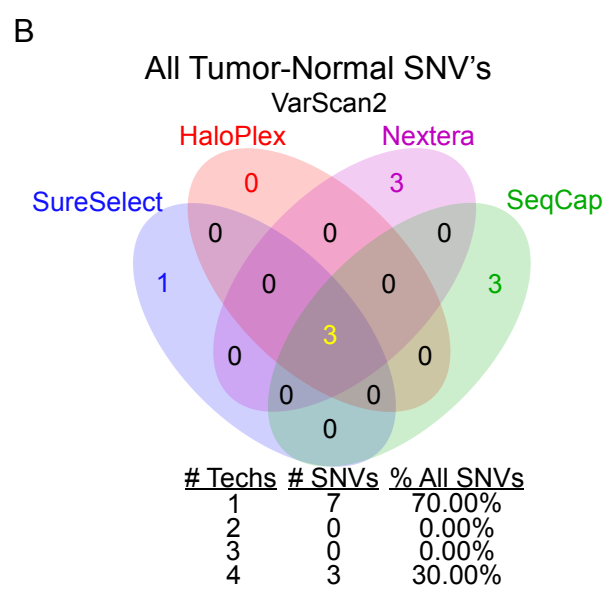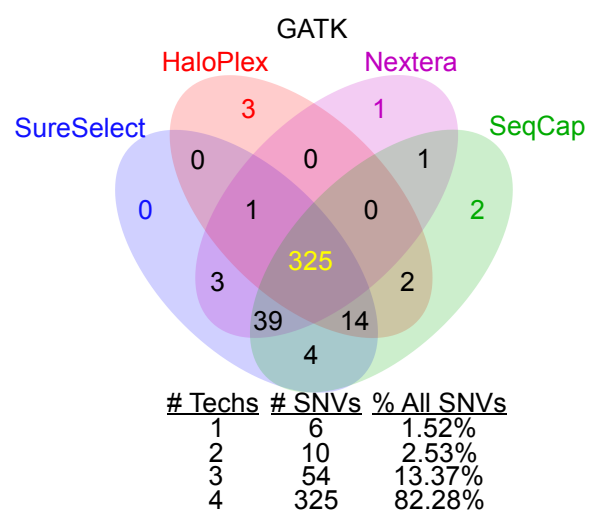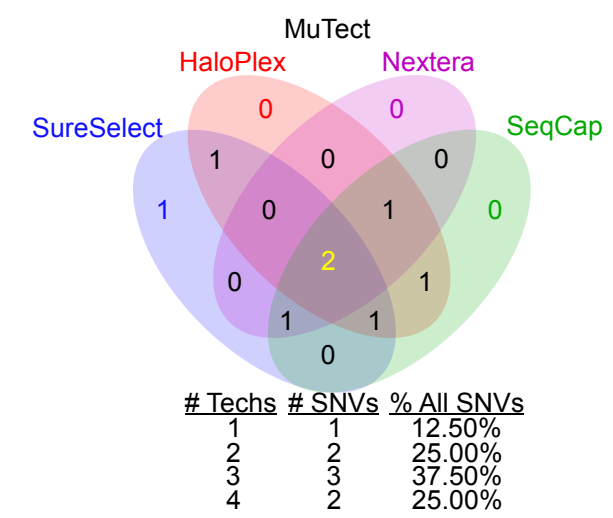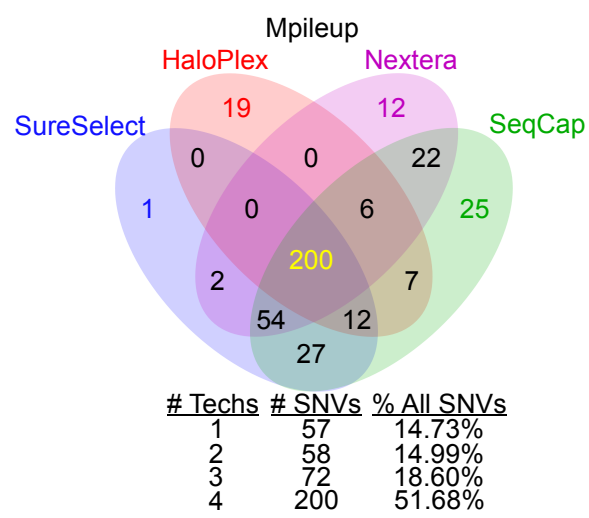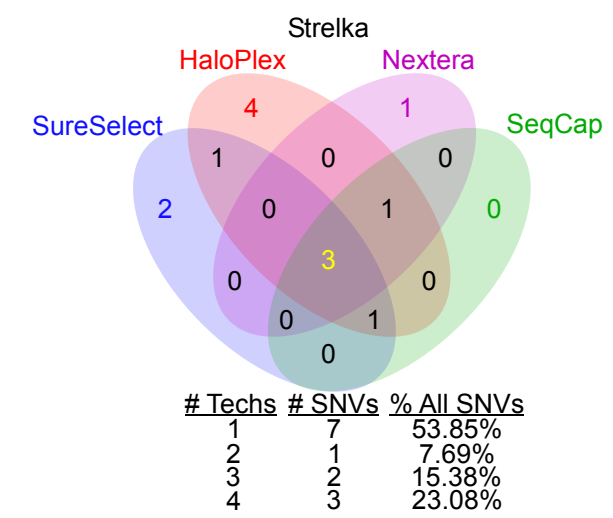

Supplement: mmc8.pdf [file mmc8.pdf]

# Supplemental Figure S9

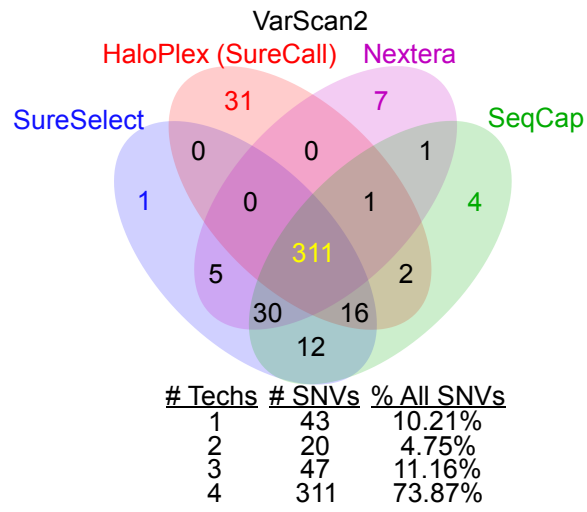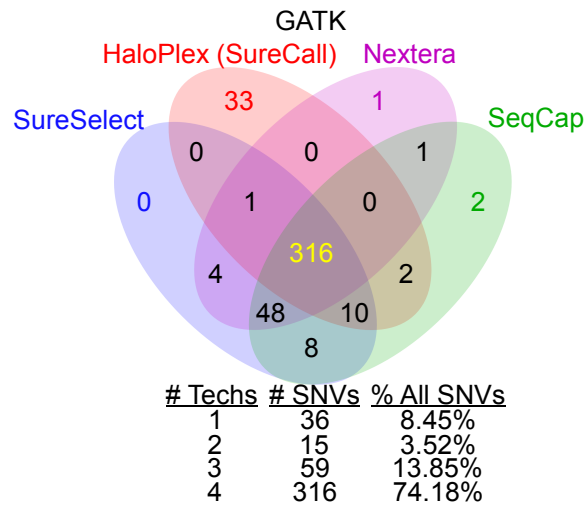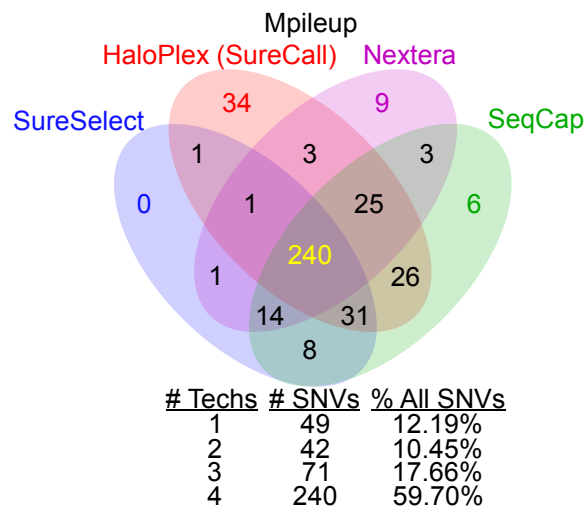

Supplement: mmc9.pdf [file mmc9.pdf]
